# Supplementary material for: Circular DNA tumor viruses make circular RNAs
Source: PubMed Central journal article supplement — Proc Natl Acad Sci U S A. 2018 Aug 27;115(37):E8737–45. doi: 10.1073/pnas.1811728115 (PMC6140489; doi:10.1073/pnas.1811728115), 2018-08-27
Supplement: pnas.1811728115.sapp.pdf [file pnas.1811728115.sapp.pdf]

1 **Supplementary Information**

2

3 **Circular DNA tumor viruses make circular RNAs**

4

5 **Tuna Toptan, Bizunesh Abere, Micheal A. Nalesnik, Steven H. Swerdlow,**  
6 **Sarangarajan Ranganathan, Nara Lee, Kathy H. Shair<sup>a</sup>, Patrick S. Moore, Yuan**  
7 **Chang**

8

9

10 **Patrick S. Moore and Yuan Chang**

11 E-mail: [psm9@pitt.edu](mailto:psm9@pitt.edu), [yc70@pitt.edu](mailto:yc70@pitt.edu)

12

13

14 **This PDF file includes:**

15 Fig. S1 to S4

16 Table S1

17 Captions for Databases S1 to S4

18 References for SI references citations

19

20 **Other supplementary materials for this manuscript include the following:**

21 Datasets S1 to S4

22



43 and circBHLF1. Viral LMP2 and cellular  $\beta$ -actin linear transcripts were analyzed as  
44 internal controls using convergent primers. DP1 RT-PCR amplified circBART-BSJ1 and  
45 BSJ2 in all conditions except B95-8 which has a deletion in BART locus. CircBHLF1  
46 BSJ-PCR product (~200bp), was detected in NaB/TPA treated Akata and B95-8. Daudi  
47 is a Burkitt's lymphoma cell line which has a deletion in BHLF1 and its promoter region.  
48 **C. circBHLF1 and circLMP2 expression in different cell lines.** CIRI2 predicted  
49 additional EBV circRNAs in BC1 (**Dataset S1**). RNase R treated (+) or untreated (-)  
50 RNAs from cell lines having various forms of EBV latency, were analyzed by RT-PCR  
51 using divergent primers spanning BSJs in circBHLF1, circLMP2 and convergent primers  
52 (black arrows) for linear LMP2 and GAPDH transcripts. Sequencing analysis of the  
53 circBHLF1-BSJ spanning PCR product confirmed the predicted junction site given in  
54 Table S1. To confirm the predicted BSJ sites for circLMP2 DP7 was used for RT-PCR  
55 (**Table S1**) which produced multiple PCR products ranging between 200-1,200 bp  
56 enriched following RNase R treatment with Akata and B95-8 RNA. Following sequencing  
57 analysis of the PCR products we found an additional junction between 58nt-1682nt in  
58 Mutu strain genome position which was validated by circLMP2 DP8 primers shown here.  
59 Basepair (bp), EBV positive (\*), nucleotide (nt). **D. circBHLF1 and circLMP2**  
60 **expression in tumor samples.** RNase R treated (+) or untreated (-) RNAs from EBV(+)  
61 PTLD9, EBV(-) PTLD7 (shown in red), NPC tumor lines C17, C15 and an EBV (+) AIDS-  
62 associated lymphoma, were used for RT-PCR with DP2 (light green arrows) primers to  
63 detect circBARTs, circBHLF1 (DP6) and circLMP2 (DP8). Convergent primers (black  
64 arrows) for LMP2 (middle panel) and GAPDH (lower panel) linear transcripts were used  
65 as internal controls and to assess RNaseR treatment efficiency.  
66

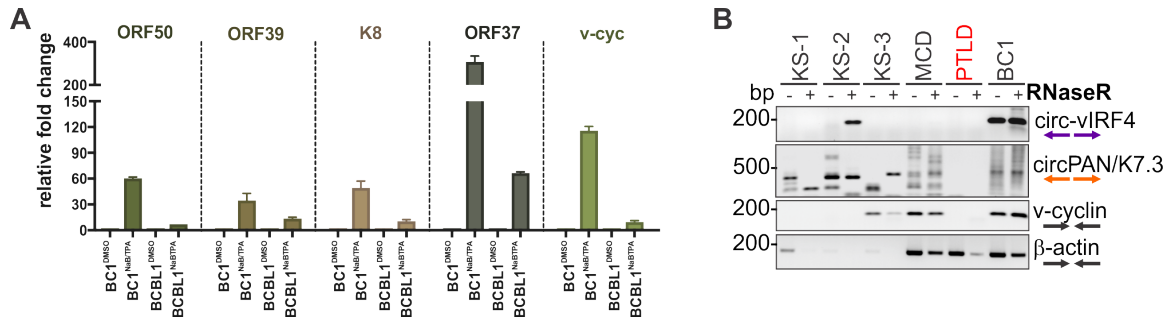

67

68 **Fig. S2. A. Viral transcript expression analysis of BC1 and BCBL1 cell lines.** KSHV

69 (+) primary effusion lymphoma lines were treated with NaB/TPA for 48 h. Extracted RNA

70 was used for Ribominus, RnaseR+ RNA sequencing. cDNA generated from these RNA

71 was analyzed for immediate early (ORF50, ORF39), early (K8, ORF37) and latent (v-

72 cyclin) transcript expression profile to assess the reactivation efficiency. The data are

73 expressed as fold change of the NaB/TPA treated versus untreated (DMSO) cells after

74 normalization to GAPDH. **B. KSHV circRNAs in KS and MCD patient tissues.** RNAs

75 extracted from three KS and one MCD show circPAN/K7.5 BSJ in all KSHV-positive

76 tissues but circvIRF4-BSJ was detected in only one KS sample. The KS specimens,

77 stored in liquid nitrogen from the mid-1990s, showed evidence of RNA degradation with

78 absence or diminished v-cyclin and β-actin mRNA RT-PCR positivity, consistent with the

79 notion that circRNAs are particularly resistant to degradation. PTLD (EBV-negative) and

80 BC-1 RNAs were used as virus negative and positive controls, respectively.

81

82

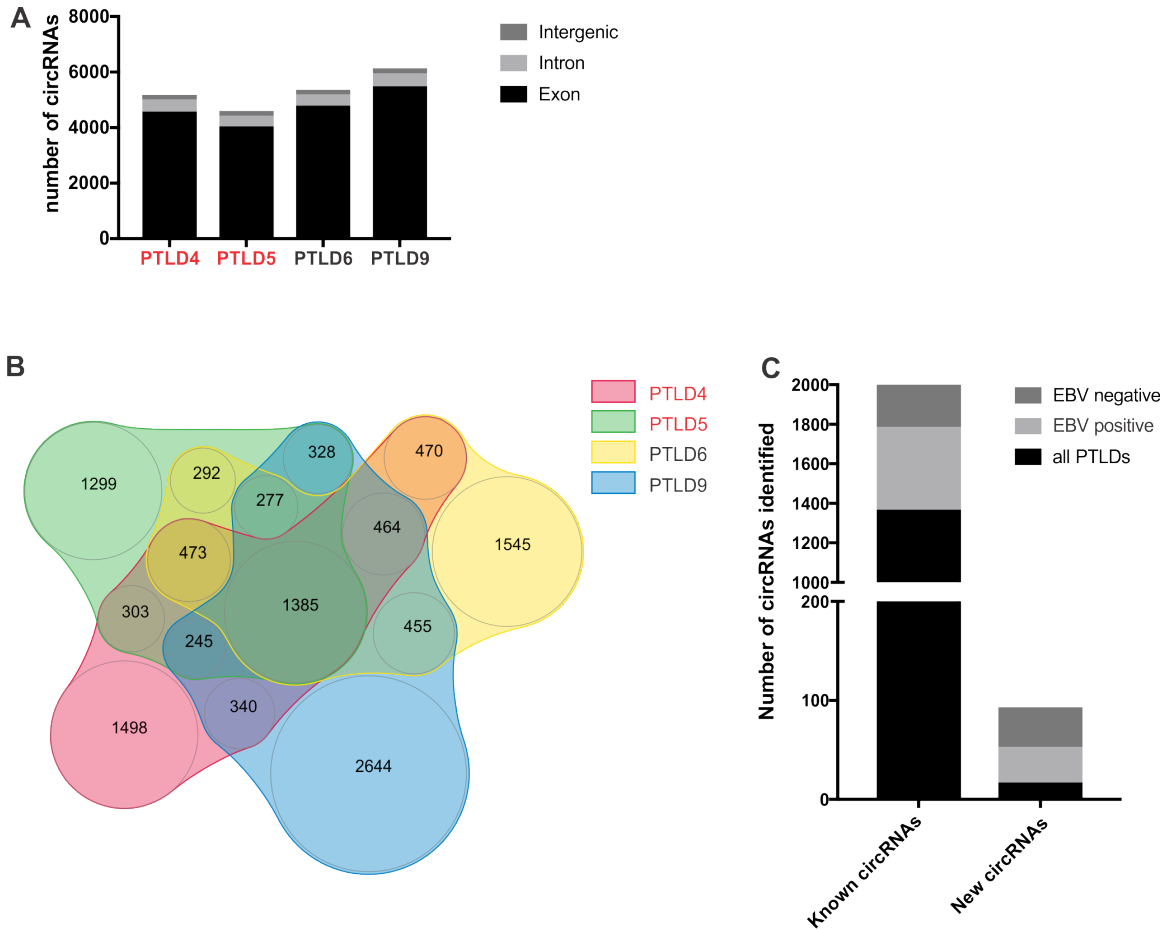

83

84 **Fig S3. A. Type of predicted human circRNAs in PTLD samples.** CIRI2 analysis  
 85 found a total of 5178, 4602, 5361 and 6138 human circRNAs in PTLD4,5,6 and 9  
 86 respectively (**Dataset S3**). ~90% of these are exonic and the rest are generated from  
 87 intronic and intergenic regions of the human genome. **B-C.** Venn diagram illustrates  
 88 shared and uniquely expressed human circRNAs predicted by CIRI2 analysis in PTLD  
 89 samples. EBV (+) PTLD 6 and 9 express 455 human circRNAs in common and 35 of  
 90 them was identified in our study. EBV (-) PTLD 4 and 5 express 303 human circRNAs in  
 91 common and we found 40 new circRNAs in this group (**Dataset S3**). ~99% of circRNAs  
 92 (1385) that are common in all samples were annotated in circBase.

93

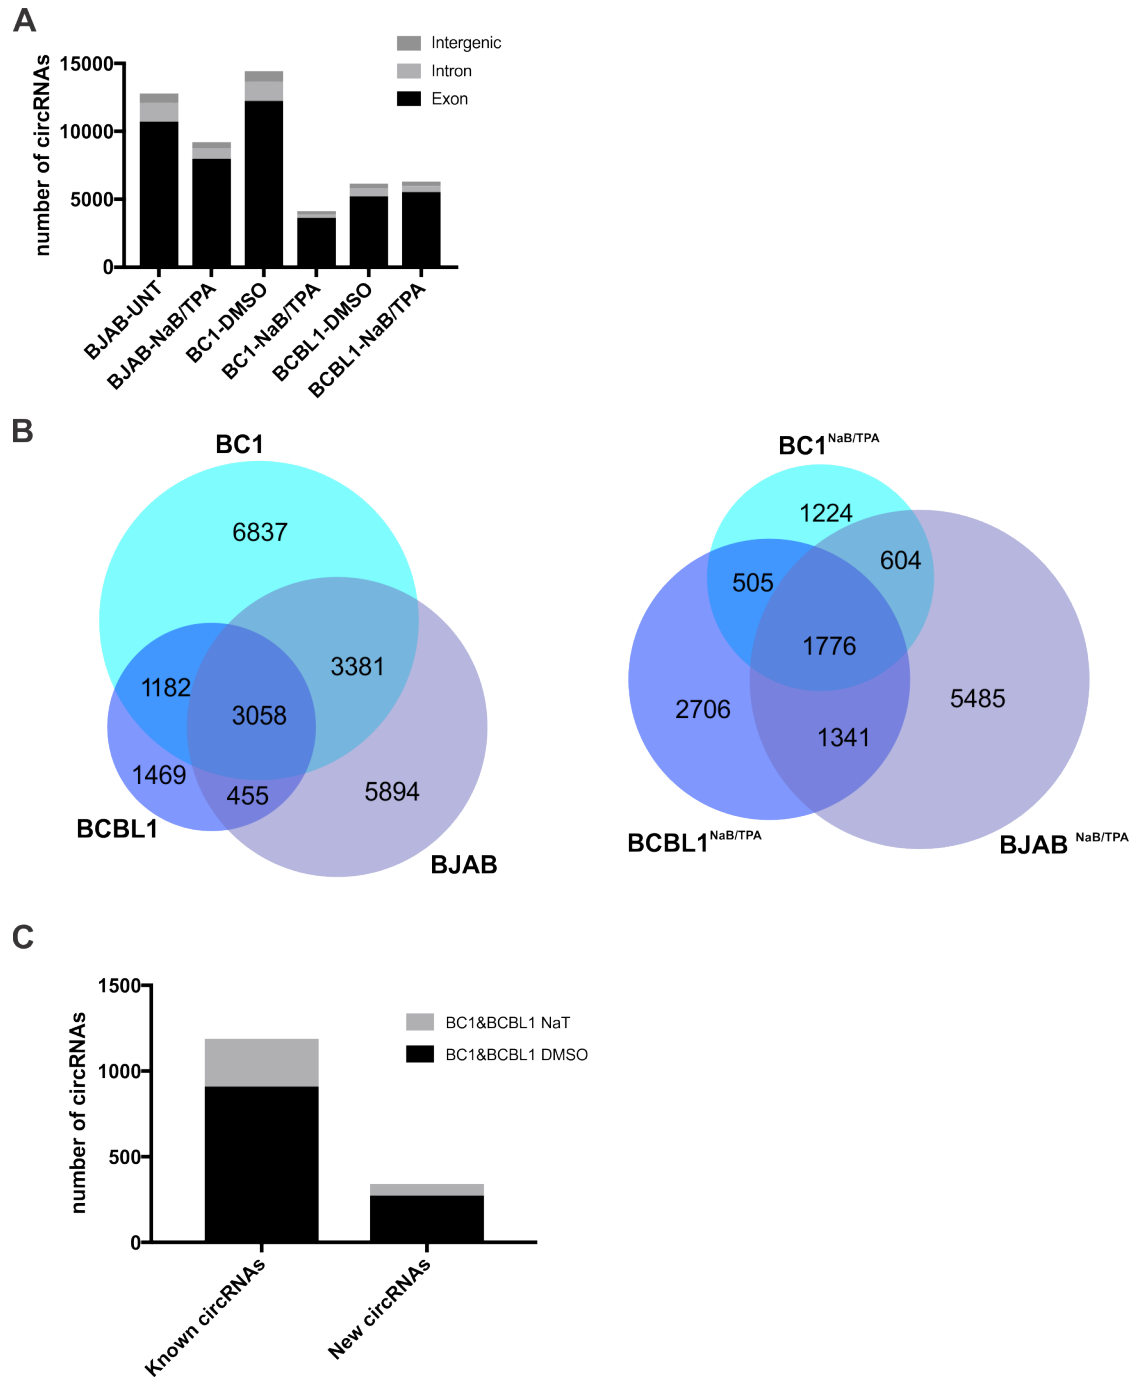

94

95

96 **Fig S4. A. Type of predicted human circRNAs in KSHV (+/-) cell lines.** CIRI2

97 analysis found a range of 4,100 to 14,400 cellular circRNAs these cell lines (**Dataset**

98 **S4**). **B-C.** Venn diagram illustrates shared and uniquely expressed human circRNAs in

99 BJAB and PEL cell lines predicted by CIRI2 analysis. We found 273 new human

100 circRNAs both in latent BC1 and BCBL1 samples. NaB/TPA treated PEL cells have 505

101 human circRNAs in common, 98 of which have not been previously reported (**Dataset**  
102 **S4**).  
103

104 **Supplementary Table and Datasets**

105 **Table S1.** Primers and antisense oligos (ASO) used in this study.

106

| Name                                               | Sequence                                           | Figures                                                       | PCR product size (bp) |
|----------------------------------------------------|----------------------------------------------------|---------------------------------------------------------------|-----------------------|
| <b>Divergent primers</b>                           |                                                    |                                                               |                       |
| DP1<br>(circBART.BSJ2)                             | CGCCCGTATTCACACATTCC<br>GACGCTAGTGCTGCATGGG        | Fig. 1, Fig. 2, Fig. 4, Fig S1                                | 160-264               |
| DP2 (circBART)                                     | AGCCCTTCTTCGTTATGCAC<br>TGAGGAATACCTCGTTGCTTCCG    | Fig. 1, Fig. 4, Fig S1                                        | 400-700               |
| DP3 (circvIRF4)                                    | CAAAGCTACGAGGAGGCAGG<br>CGCCGACACCAACGCATCAAAC     | Fig. 3                                                        | 577                   |
| DP4 (circvIRF4)                                    | GGCGATATAACGACTGAACAGA<br>CAAATGCATGGTACACCGAATAC  | Fig 3, Fig. 4, Fig. S2                                        | 139                   |
| DP5<br>(circPAN/K7.3)                              | CGCCCACCTGGTATCAGA<br>AATCGCAGCTTTTGTCTGC          | Fig. 3, Fig. S2                                               | 126-668               |
| DP6 (circBHLF1)                                    | CGCTTGCCTGGTCTCTGG<br>CAGGCGTACCGGGCCAG            | Fig. S1                                                       | 216                   |
| DP7 (circLMP2)                                     | CACCAGCGATTAGCGCG<br>GGTCATTAGATGCTGCCGCTAC        | Fig. S1                                                       | 210-1,178             |
| DP8 (circLMP2)                                     | GCAGCGGCATATGAGCTGG<br>GGTCATTAGATGCTGCCGCTAC      | Fig. S1                                                       | 258                   |
| DP9 (circvIRF4)                                    | CATTTGATGAGGAGTGTGATAGAG<br>GAACCGCTATTACAATGTTGGC | entire circvIRF4<br>amplification and<br>sequencing<br>Fig. 3 | 632                   |
| DP10<br>(circPAN/K7.3)                             | TTCTGTGTTTGTCTGATTCTTAG<br>CCGAAACAACGAATGAGCA     | Fig. 3                                                        | 325-744               |
| DP11<br>(circBART.BSJ1)                            | GGTCAAGTAGCTGCGTCCAAA<br>GACGCTAGTGCTGCATGGG       | Fig. 4                                                        | 117                   |
| <b>Convergent primers used for RT-PCR and qPCR</b> |                                                    |                                                               |                       |
| GAPDH.F                                            | GTCATCAATGGAAATCCCATCACC                           | Fig. 1, Fig. 2, Fig. 3                                        | 320                   |
| GAPDH.R                                            | TGAGTCCTTCCACGATACCAAA                             |                                                               |                       |
| GAPDH.F                                            | TGCACCACCAACTGCTTAGC                               | Fig.3                                                         | 98                    |
| GAPDH.R                                            | GGCATGGACTGTGGTCATGAG                              |                                                               |                       |
| Beta-actin.F                                       | CACACTGTGCCCATCTATGAGG                             | Fig. 3, Fig. S2                                               | 191                   |
| Beta-actin.R                                       | TCGAAGTCTAGGGCGACATAGC                             |                                                               |                       |
| 18S.F                                              | CGAACGTCTGCCATCAACTT                               | Fig. 3                                                        | 115                   |
| 18S.R                                              | TGTGGTAGCCGTTTCTCAGG                               |                                                               |                       |
| vIL6.F                                             | TTCAAAAACACGCACCGCTTG                              | Fig. 3                                                        | 210                   |
| vIL6.R                                             | AAACGTGGACGTCATGGAGC                               |                                                               |                       |
| v-cyc.F                                            | CGCCTGTAGAACGGAAACAT                               | Fig. 3, Fig.4, Fig. S2                                        | 137                   |
| v-cyc.R                                            | TTGCCCGCCTCTATTATCAG                               |                                                               |                       |
| LANA F                                             | TTTAGTGTAGAGGGACCTTGGG                             | Fig. 3                                                        | 258                   |
| LANA R                                             | TCTCCATCTCCTGCATTGCC                               |                                                               |                       |
| KSHV.ORF50.F                                       | CAGAGTCTATTCGCCCTGTTAG                             | Fig. S2                                                       | 115                   |
| KSHV.ORF50.R                                       | CTGGTACAGTCCTTGCAGAATA                             |                                                               |                       |
| KSHV.K8.F                                          | CCAAGAGGCGACTACATAGAAAG                            | Fig. S2                                                       | 111                   |
| KSHV.K8.R                                          | GGGTGATGTTCCCTACCTTAAC                             |                                                               |                       |
| KSHV.ORF37.F                                       | TGGGCGAGTTTATTGGTAGTG                              | Fig. S2                                                       | 125                   |
| KSHV.ORF37.R                                       | CGCTGATGTGCGTTTCATTTG                              |                                                               |                       |
| KSHV.ORF39.F                                       | CAGGCAGCAGTAGAATCAGATAA                            | Fig. S2                                                       | 110                   |
| KSHV.ORF39.R                                       | GACGGTCGTGGTACATAAA                                |                                                               |                       |
| LMP2.F                                             | TGCCTGCCTGTAATTGTTGCG                              | Fig. 1, Fig. 2, Fig. 4                                        | 151                   |
| LMP2.R                                             | GCAGCGGCATATGAGCTGG                                |                                                               |                       |



**Antisense oligos (ASO)**

circBART\_AS0-BSJ2 mG\*mA\*mC\* mA\*mC\*mG\* C\*C\*G\* G\*A\*C\* C\*T\*T\* G\*C\*C\* mC\*mG\*mU\* mC\*mG\*mA  
circBART\_AS0-BSJ1 mG\*mC\*mC\*mC\*mA\*mA\*T\*G\*G\*C\*A\*T\*C\*T\*T\*G\*C\*C\*mC\*mG\*mU\*mC\*mG\*mA  
circVRF4\_AS0 mG\*mG\*mG\*mG\*mC\*mG\*C\*G\*G\*G\*G\*C\*T\*G\*A\*G\*G\*mU\*mA\*mG\*mA\*mU\*mG

107  
108

109 **Captions for the Datasets**

110 **Dataset S1.** CIRI2 EBV circRNA prediction analysis in BC1, PTLD6 and PTLD9  
111 samples.

112 **Dataset S2.** CIRI2 EBV circRNA prediction analysis in BC1 and BCBL1 samples.

113 **Dataset S3.** CIRI2 human circRNA prediction analysis in EBV negative PTLD 4, PTLD5  
114 and EBV positive PTLD6 and PTLD9 samples.

115 **Dataset S4.** CIRI2 human circRNA prediction analysis in KSHV positive PEL (BC1,  
116 BCBL1) and KSHV negative BJAB cells.

117 Column headings indicate chromosome (chr), circRNA start and end position, strand,  
118 junction read counts, SM\_MS\_SMS, non-junction read counts, junction read ratio,

119 circRNA type, and associated gene IDs for each predicted circRNA. SM\_MS\_SMS

120 refers to types of paired chiastic clipping (PCC) signals detected by CIRI2 (1). For viral  
121 circRNAs calculated reads per mission (RPM) based on total aligned reads are given.

122 In Datasets 3 and 4 circBase IDs for indicated samples are also indicated.

123

124  
125  
126  
127  
128  
129

## References

1. Gao Y, Wang J, & Zhao F (2015) CIRI: an efficient and unbiased algorithm for de novo circular RNA identification. *Genome Biol* 16:4.
